# Supplementary material
Source: publisher figshare collection journal article supplement (https://tandf.figshare.com/ndownloader/files/22782845)
Supplement: Supplementary file 1 [file 22782845]

**Increased removal of cadmium by *Chlamydomonas reinhardtii* modified with a synthetic gene for  $\gamma$ -glutamylcysteine synthetase**

René Piña-Olavide, Luz M. T. Paz-Maldonado, M. Catalina Alfaro de la Torre, Mariano J. García-Soto, Angélica E. Ramírez-Rodríguez, Sergio Rosales-Mendoza, Bernardo Bañuelos-Hernández, Ramón Fernando García de la Cruz\*

*Facultad de Ciencias Químicas, Universidad Autónoma de San Luis Potosí, San Luis Potosí, México.*

**Supplemental Material**

**Figure S1.** pH of the media with cadmium during the growth of *C. reinhardtii* WT (a) and its transformed clone RPO2 (b).

**Figure S2.** Cadmium remaining in solution during the growth of *C. reinhardtii* WT (a) and its transformed clone RPO2 (b) in media with cadmium.

**Figure S3.** Cadmium removed by *C. reinhardtii* WT (a) and its transformed clone RPO2 (b) during their growth in media with cadmium.

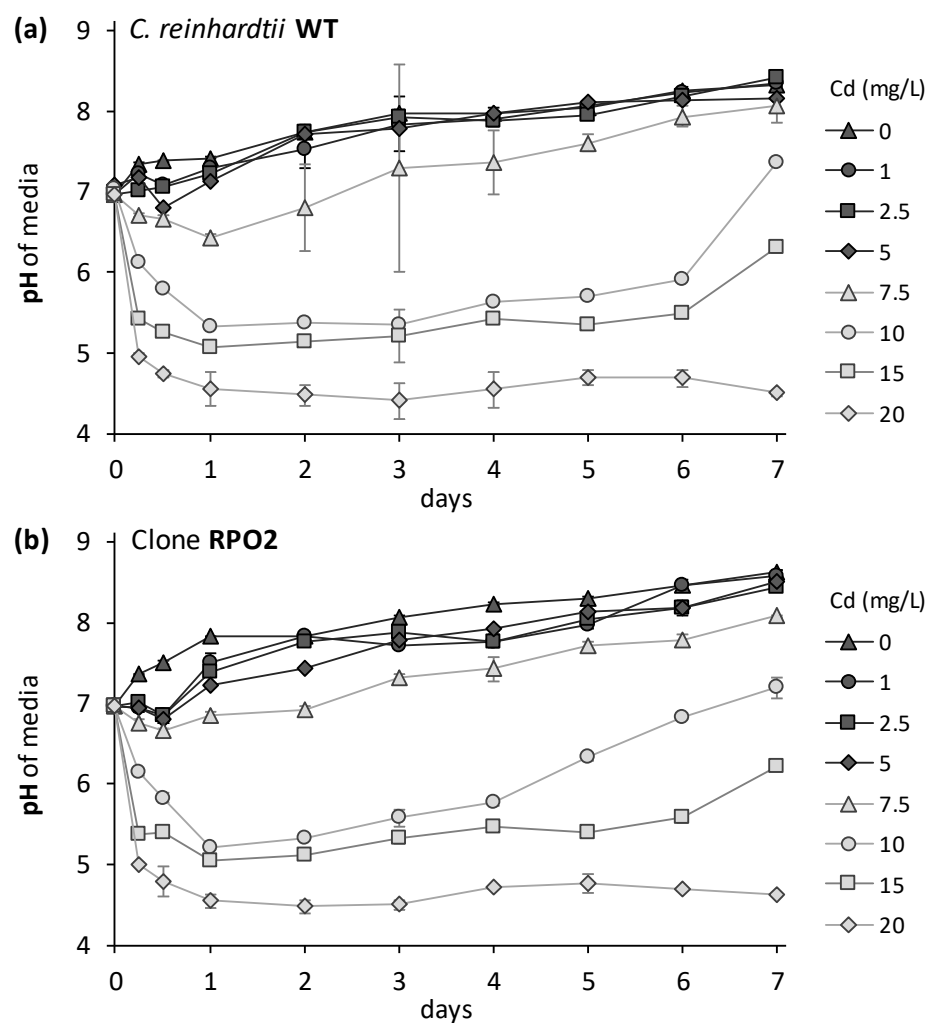

**Figure S1.** pH of the media with cadmium during the growth of *C. reinhardtii* WT (a) and its transformed clone RPO2 (b).

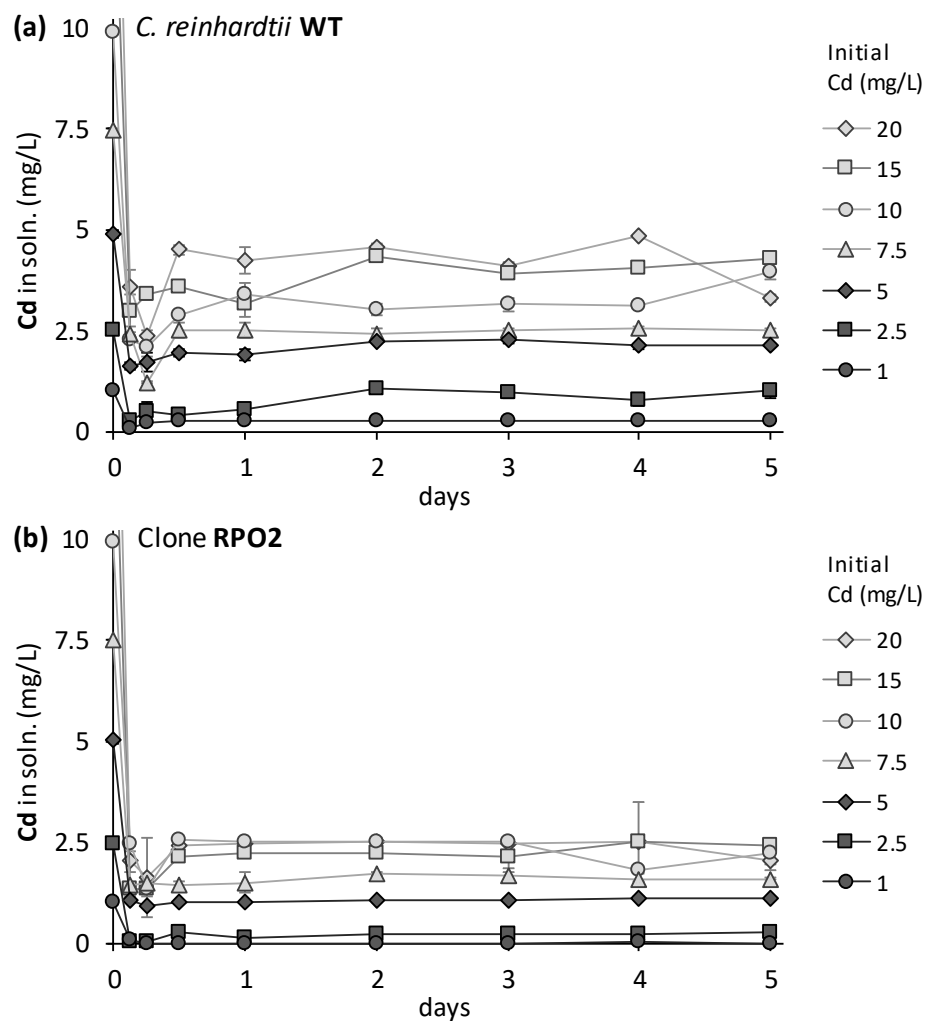

**Figure S2.** Cadmium remaining in solution during the growth of *C. reinhardtii* WT (a) and its transformed clone RPO2 (b) in media with cadmium.

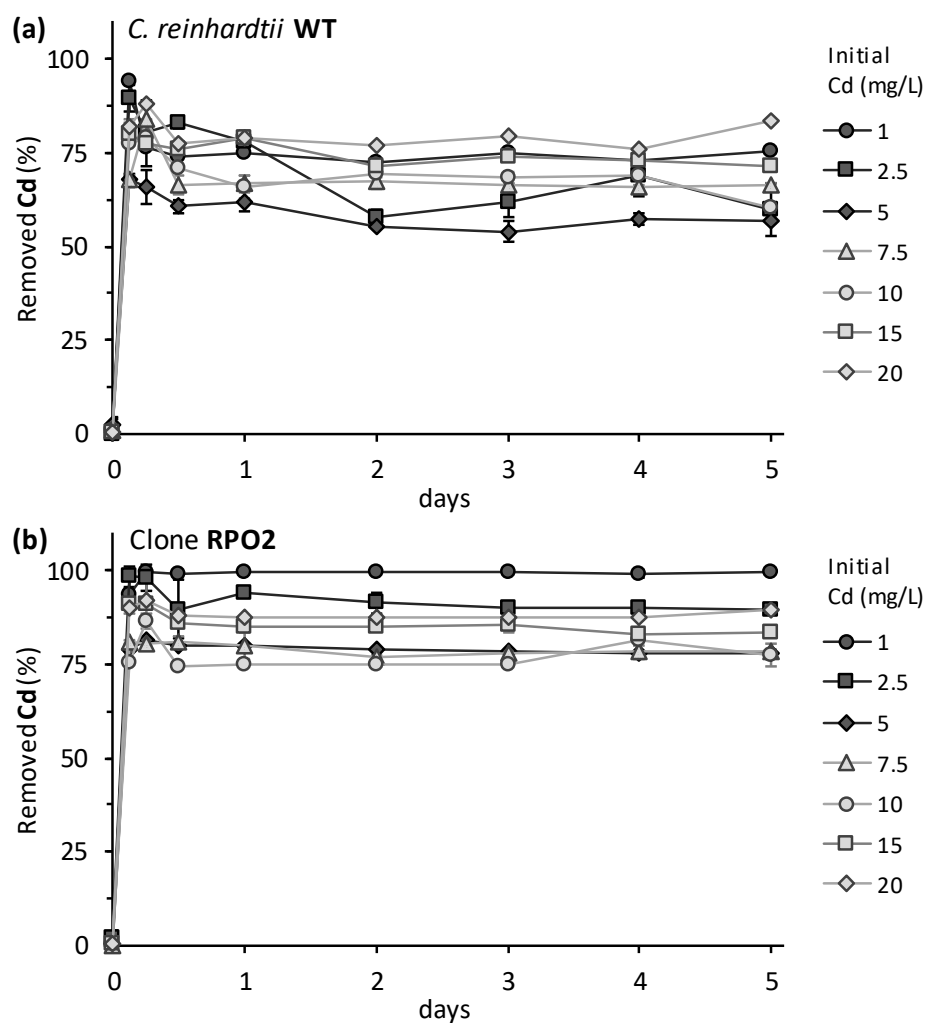

**Figure S3.** Cadmium removed by *C. reinhardtii* WT (a) and its transformed clone RPO2 (b) during their growth in media with cadmium.
